# Supplementary material for: Bi-Directional SIFT Predicts a Subset of Activating Mutations
Source: PubMed Central journal article supplement (PMC2788704; doi:10.1371/journal.pone.0008311), 2009-12-14

## Distribution of Swiss-Prot mutant SIFT scores

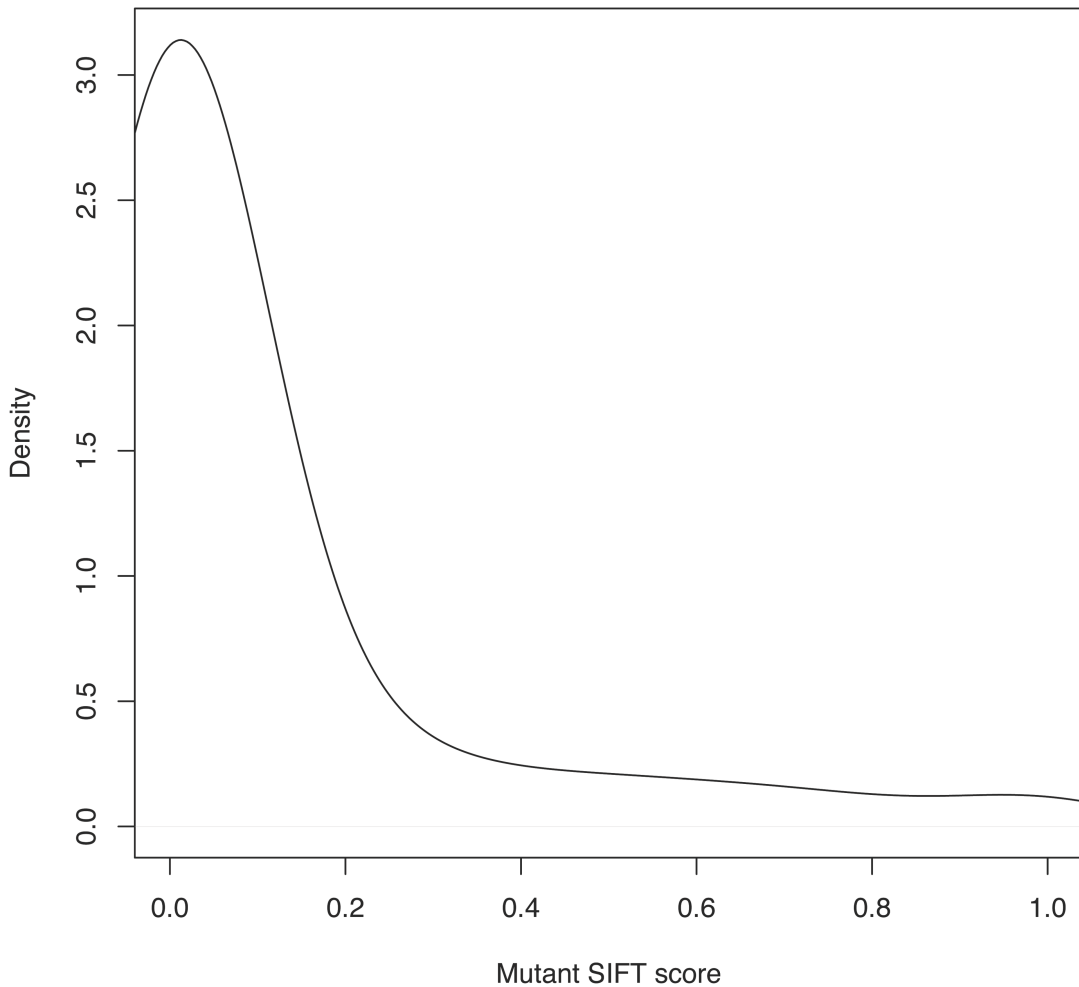

Supplement: pone.0008311.s003.pdf [file pone.0008311.s003.pdf]
