# Supplementary material for: Bi-Directional SIFT Predicts a Subset of Activating Mutations
Source: PubMed Central journal article supplement (PMC2788704; doi:10.1371/journal.pone.0008311), 2009-12-14

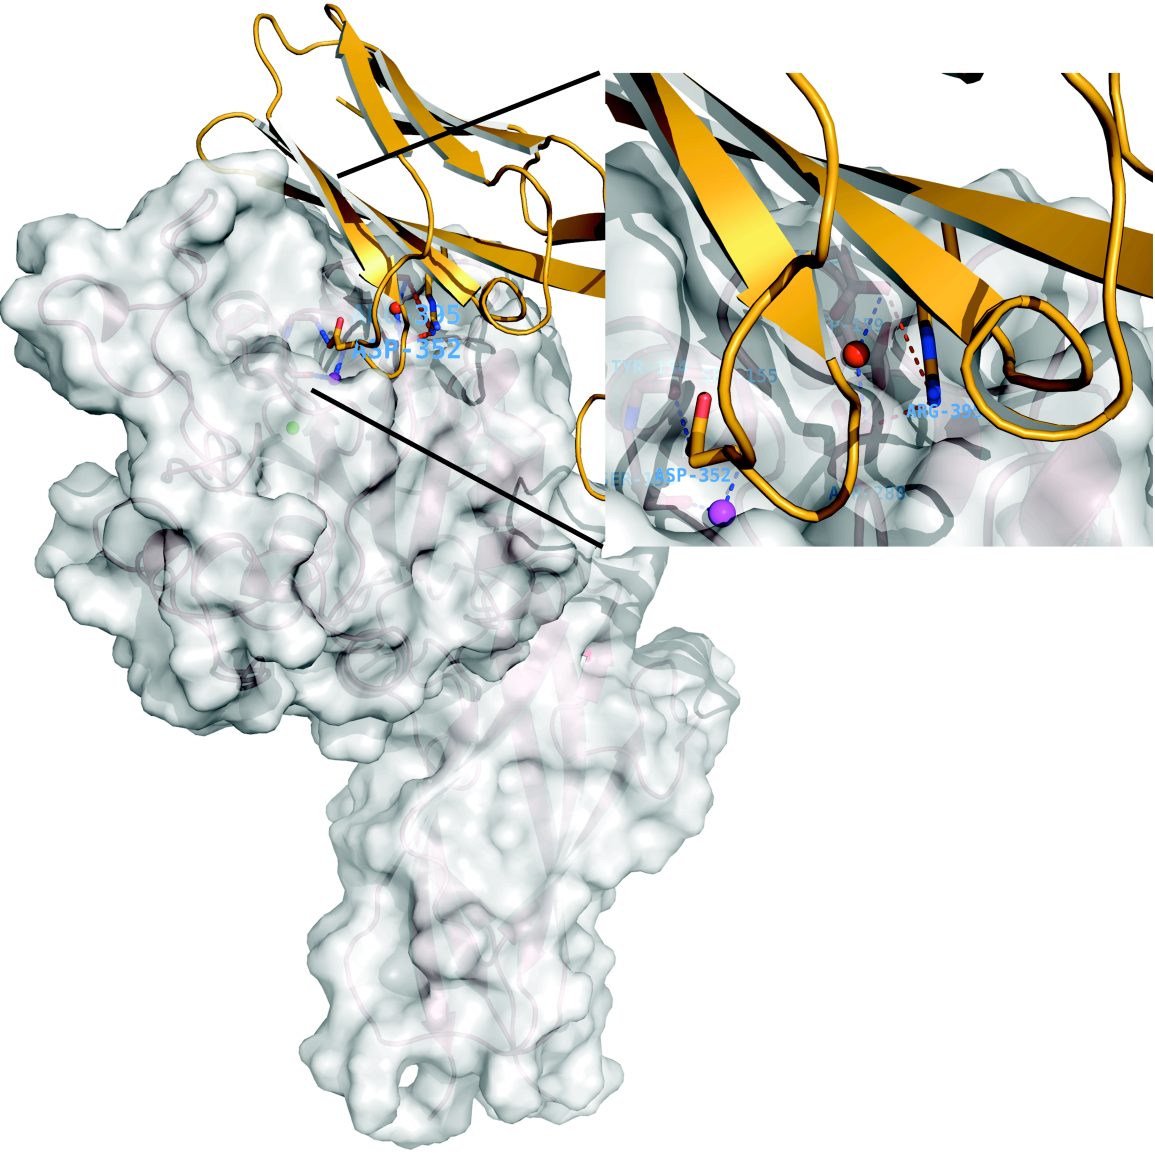

Supplement: pone.0008311.s006.pdf [file pone.0008311.s006.pdf]
